# Supplementary material
Source: ML conference proceedings conference paper supplement (https://openaccess.thecvf.com/content/ICCV_2019/html/Wu_ACE_Adapting_to_ICCV_2019_paper.html)
Supplement: Supplementary file 1 [file Wu_ACE_Adapting_to_ICCV_2019_supplemental.pdf]

# ACE: Adapting to Changing Environments for Semantic Segmentation (Supplemental Material)

## Detailed Architecture of the Decoder

Figure 1 presents the detailed architecture of the decoder used to synthesize new images. In particular, operating on re-normaralized feature maps, it gradually increases the resolution of feature maps while decreasing the number of channels.

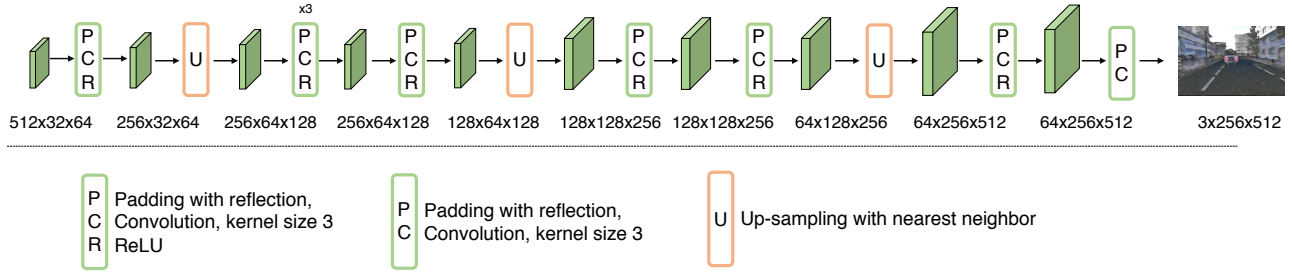

Figure 1: Architecture of the decoder.
